# Supplementary material
Source: MDPI journal article supplement (https://www.mdpi.com/2073-445X/13/4/558)
Supplement: s1 [file s1]

### **Checklist of Questionnaires used during KII**

1. What are the current institutional arrangements in the CHT, Bangladesh?
2. What do you think are the key challenges for FLR implementation within the current institutional framework?
3. From your experience, what are the key factors contributing to ecological degradation in the CHT region?
4. To what extent do local communities' rights and opinions regarding land and resources reflect in the decision-making and implementation of development initiatives in the CHT region, particularly in the context of FLR efforts?
5. What are the potential benefits of FLR projects in the CHT region?
6. How do you think the current institutional framework needs to be improved to facilitate FLR implementation more effectively and efficiently?
7. What support/resources do you think are essential to enhance the region's ecological integrity through FLR initiatives?
8. How partnerships/collaborative management can be developed to implement FLR efforts?
9. What strategies or interventions would you suggest for successful FLR implementation?
